# Supplementary material
Source: publisher figshare collection journal article supplement (https://acs.figshare.com/ndownloader/files/4400701)
Supplement: Supplementary file 1 [file 4400701]

## Supplementary material

Figure S1

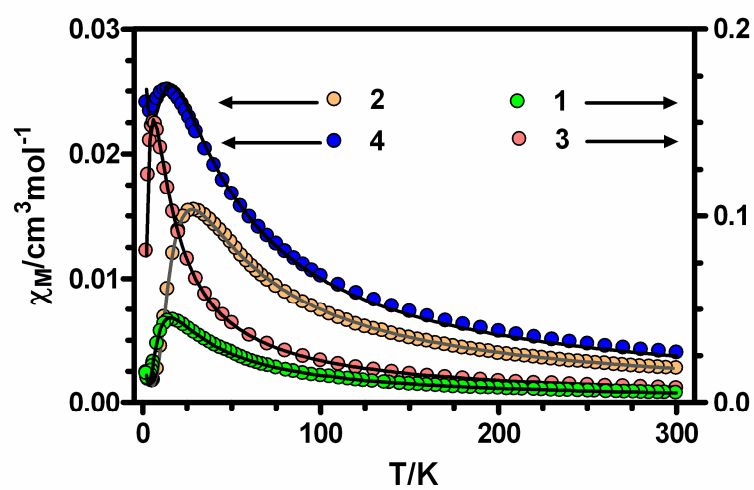

**Figure 6.** Temperature dependence of  $\chi_M$  for compounds 1-4. As indicated by the arrows, 1 and 3 are represented on right axis whereas 2 and 4 are represented on the left axis.
